# Supplementary material for: Everolimus With Reduced Tacrolimus Improves Renal Function in De Novo Liver Transplant Recipients: A Randomized Controlled Trial
Source: PubMed Central journal article supplement (PMC3533764; doi:10.1111/j.1600-6143.2012.04212.x), 2012-11

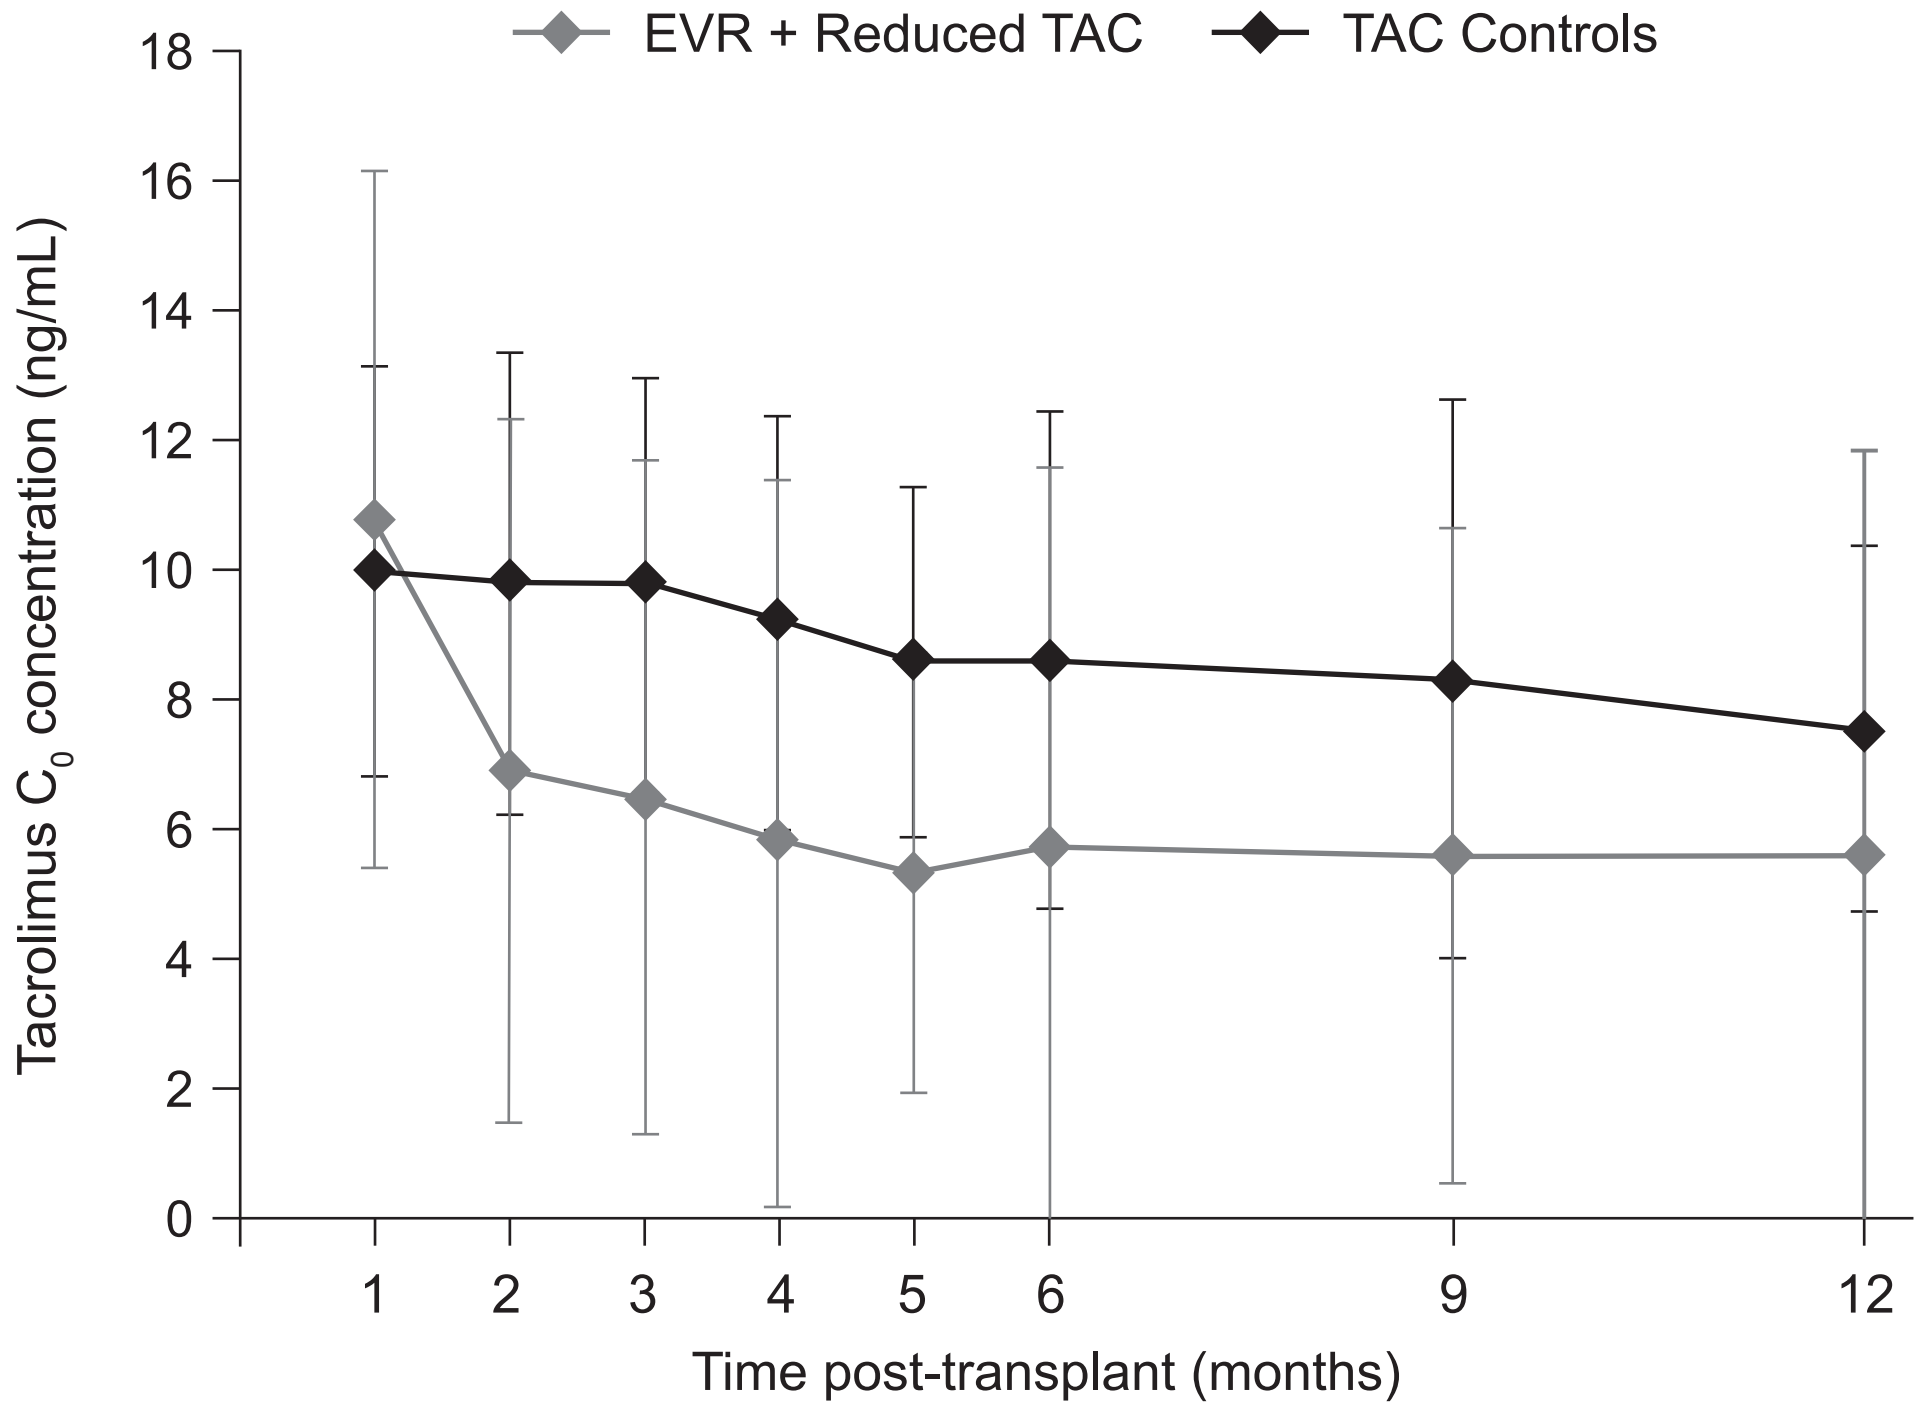

Supplement: ajt0012-3008-SD2.pdf [file ajt0012-3008-SD2.pdf]
